# Supplementary material
Source: publisher figshare collection journal article supplement (https://acs.figshare.com/ndownloader/files/4523017)
Supplement: Supplementary file 1 [file 4523017]

data_gad03m

 

_audit_creation_method            SHELXL-97

_chemical_name_systematic

;

 ?

;

_chemical_name_common             ?

_chemical_melting_point           ?

_chemical_formula_moiety          ?

_chemical_formula_sum

 'C44 H86 B4 Cl2 P4'

_chemical_formula_weight          853.15

 

loop_

 _atom_type_symbol

 _atom_type_description

 _atom_type_scat_dispersion_real

 _atom_type_scat_dispersion_imag

 _atom_type_scat_source

 'C'  'C'   0.0033   0.0016

 'International Tables Vol C Tables 4.2.6.8 and 6.1.1.4'

 'H'  'H'   0.0000   0.0000

 'International Tables Vol C Tables 4.2.6.8 and 6.1.1.4'

 'B'  'B'   0.0013   0.0007

 'International Tables Vol C Tables 4.2.6.8 and 6.1.1.4'

 'P'  'P'   0.1023   0.0942

 'International Tables Vol C Tables 4.2.6.8 and 6.1.1.4'

 'Cl'  'Cl'   0.1484   0.1585

 'International Tables Vol C Tables 4.2.6.8 and 6.1.1.4'

 

_symmetry_cell_setting            Triclinic

_symmetry_space_group_name_H-M    P-1

 

loop_

 _symmetry_equiv_pos_as_xyz

 'x, y, z'

 '-x, -y, -z'

 

_cell_length_a                    13.1771(10)

_cell_length_b                    14.2465(11)

_cell_length_c                    14.6210(11)

_cell_angle_alpha                 67.4280(10)

_cell_angle_beta                  88.6680(10)

_cell_angle_gamma                 87.4890(10)

_cell_volume                      2532.0(3)

_cell_formula_units_Z             2

_cell_measurement_temperature     173(2)

_cell_measurement_reflns_used     6503

_cell_measurement_theta_min       2.148

_cell_measurement_theta_max       30.114

 

_exptl_crystal_description        plate

_exptl_crystal_colour             'lustrous intense colourless'

_exptl_crystal_size_max           0.80

_exptl_crystal_size_mid           0.50

_exptl_crystal_size_min           0.03

_exptl_crystal_density_meas       0

_exptl_crystal_density_diffrn     1.119

_exptl_crystal_density_method     'not measured'

_exptl_crystal_F_000              928

_exptl_absorpt_coefficient_mu     0.283

_exptl_absorpt_correction_type    'multi-scans'

_exptl_absorpt_correction_T_min   0.8053

_exptl_absorpt_correction_T_max   0.9916

_exptl_absorpt_process_details    'SADABS (Bruker-AXS)'

 

_exptl_special_details

;

 ?

;

 

_diffrn_ambient_temperature       173(2)

_diffrn_radiation_wavelength      0.71073

_diffrn_radiation_type            MoK\a

_diffrn_radiation_source          'fine-focus sealed tube'

_diffrn_radiation_monochromator   graphite

_diffrn_measurement_device_type   'Bruker CCD detector'

_diffrn_measurement_method        'phi and omega scans'

_diffrn_detector_area_resol_mean  ?

_diffrn_standards_number          ?

_diffrn_standards_interval_count  ?

_diffrn_standards_interval_time   ?

_diffrn_standards_decay_%         ?

_diffrn_reflns_number             17763

_diffrn_reflns_av_R_equivalents   0.0247

_diffrn_reflns_av_sigmaI/netI     0.0374

_diffrn_reflns_limit_h_min        -15

_diffrn_reflns_limit_h_max        15

_diffrn_reflns_limit_k_min        -16

_diffrn_reflns_limit_k_max        16

_diffrn_reflns_limit_l_min        -17

_diffrn_reflns_limit_l_max        17

_diffrn_reflns_theta_min          5.10

_diffrn_reflns_theta_max          24.71

_reflns_number_total              8463

_reflns_number_gt                 6544

_reflns_threshold_expression      >2sigma(I)

 

_computing_data_collection        'Bruker SMART'

_computing_cell_refinement        'Bruker SMART'

_computing_data_reduction         'Bruker SHELXTL'

_computing_structure_solution     'SHELXS-97 (Sheldrick, 1990)'

_computing_structure_refinement   'SHELXL-97 (Sheldrick, 1997)'

_computing_molecular_graphics     'Bruker SHELXTL'

_computing_publication_material   'Bruker SHELXTL'

 

_refine_special_details

;

 Refinement of F^2^ against ALL reflections.  The weighted R-factor wR and

 goodness of fit S are based on F^2^, conventional R-factors R are based

 on F, with F set to zero for negative F^2^. The threshold expression of

 F^2^ > 2sigma(F^2^) is used only for calculating R-factors(gt) etc. and is

 not relevant to the choice of reflections for refinement.  R-factors based

 on F^2^ are statistically about twice as large as those based on F, and R-

 factors based on ALL data will be even larger.

;

 

_refine_ls_structure_factor_coef  Fsqd

_refine_ls_matrix_type            full

_refine_ls_weighting_scheme       calc

_refine_ls_weighting_details

 'calc w=1/[\s^2^(Fo^2^)+(0.0437P)^2^+1.0440P] where P=(Fo^2^+2Fc^2^)/3'

_atom_sites_solution_primary      direct

_atom_sites_solution_secondary    difmap

_atom_sites_solution_hydrogens    geom

_refine_ls_hydrogen_treatment     mixed

_refine_ls_extinction_method      none

_refine_ls_extinction_coef        ?

_refine_ls_number_reflns          8463

_refine_ls_number_parameters      543

_refine_ls_number_restraints      84

_refine_ls_R_factor_all           0.0552

_refine_ls_R_factor_gt            0.0370

_refine_ls_wR_factor_ref          0.0963

_refine_ls_wR_factor_gt           0.0864

_refine_ls_goodness_of_fit_ref    1.010

_refine_ls_restrained_S_all       1.006

_refine_ls_shift/su_max           0.001

_refine_ls_shift/su_mean          0.000

 

loop_

 _atom_site_label

 _atom_site_type_symbol

 _atom_site_fract_x

 _atom_site_fract_y

 _atom_site_fract_z

 _atom_site_U_iso_or_equiv

 _atom_site_adp_type

 _atom_site_occupancy

 _atom_site_symmetry_multiplicity

 _atom_site_calc_flag

 _atom_site_refinement_flags

 _atom_site_disorder_assembly

 _atom_site_disorder_group

P1 P 0.13347(4) 0.71608(4) 0.95957(4) 0.02460(13) Uani 1 1 d . . .

P2 P 0.34540(4) 0.72048(4) 0.95489(4) 0.02514(13) Uani 1 1 d . . .

B1 B 0.23224(18) 0.82701(17) 0.94512(19) 0.0286(5) Uani 1 1 d . . .

Cl1 Cl 0.23098(4) 0.83128(4) 1.07349(4) 0.03944(15) Uani 1 1 d . . .

B2 B 0.24527(17) 0.61499(17) 1.01919(18) 0.0265(5) Uani 1 1 d . . .

H2 H 0.2432(15) 0.6213(15) 1.0915(16) 0.030(6) Uiso 1 1 d . . .

C1 C 0.02010(16) 0.69923(17) 1.04160(17) 0.0349(5) Uani 1 1 d . . .

H1 H -0.0312 0.6660 1.0159 0.042 Uiso 1 1 calc R . .

C2 C 0.04171(19) 0.62744(18) 1.14743(17) 0.0427(6) Uani 1 1 d . . .

H2A H 0.0902 0.6578 1.1768 0.064 Uiso 1 1 calc R . .

H2B H 0.0705 0.5627 1.1478 0.064 Uiso 1 1 calc R . .

H2C H -0.0216 0.6155 1.1860 0.064 Uiso 1 1 calc R . .

C3 C -0.03039(18) 0.80007(19) 1.0382(2) 0.0450(6) Uani 1 1 d . . .

H3A H -0.0935 0.7862 1.0770 0.067 Uiso 1 1 calc R . .

H3B H -0.0456 0.8441 0.9693 0.067 Uiso 1 1 calc R . .

H3C H 0.0158 0.8341 1.0660 0.067 Uiso 1 1 calc R . .

C4 C 0.08135(15) 0.71657(15) 0.84329(16) 0.0291(5) Uani 1 1 d . . .

H4 H 0.1391 0.7280 0.7951 0.035 Uiso 1 1 calc R . .

C5 C 0.03722(17) 0.61413(17) 0.85690(19) 0.0392(6) Uani 1 1 d . . .

H5A H -0.0254 0.6047 0.8964 0.059 Uiso 1 1 calc R . .

H5B H 0.0867 0.5590 0.8911 0.059 Uiso 1 1 calc R . .

H5C H 0.0222 0.6132 0.7919 0.059 Uiso 1 1 calc R . .

C6 C 0.00015(17) 0.80074(17) 0.79506(18) 0.0385(5) Uani 1 1 d . . .

H6A H -0.0161 0.8024 0.7294 0.058 Uiso 1 1 calc R . .

H6B H 0.0259 0.8665 0.7885 0.058 Uiso 1 1 calc R . .

H6C H -0.0613 0.7870 0.8365 0.058 Uiso 1 1 calc R . .

C7 C 0.22743(18) 0.94082(16) 0.86039(18) 0.0378(5) Uani 1 1 d . . .

C8 C 0.3191(2) 0.99994(18) 0.8705(2) 0.0586(8) Uani 1 1 d . . .

H8A H 0.3153 1.0691 0.8196 0.088 Uiso 1 1 calc R . .

H8B H 0.3822 0.9651 0.8619 0.088 Uiso 1 1 calc R . .

H8C H 0.3179 1.0032 0.9362 0.088 Uiso 1 1 calc R . .

C9 C 0.22889(19) 0.94243(17) 0.75457(17) 0.0428(6) Uani 1 1 d . . .

H9A H 0.2320 1.0128 0.7068 0.064 Uiso 1 1 calc R . .

H9B H 0.1671 0.9125 0.7436 0.064 Uiso 1 1 calc R . .

H9C H 0.2885 0.9030 0.7459 0.064 Uiso 1 1 calc R . .

C10 C 0.1310(2) 1.00008(18) 0.8722(2) 0.0543(7) Uani 1 1 d . . .

H10A H 0.1295 1.0020 0.9385 0.082 Uiso 1 1 calc R . .

H10B H 0.0709 0.9664 0.8634 0.082 Uiso 1 1 calc R . .

H10C H 0.1313 1.0697 0.8223 0.082 Uiso 1 1 calc R . .

C11 C 0.40200(16) 0.71828(16) 0.83847(16) 0.0319(5) Uani 1 1 d . . .

H11 H 0.3449 0.7235 0.7927 0.038 Uiso 1 1 calc R . .

C12 C 0.47302(18) 0.80535(18) 0.78430(18) 0.0445(6) Uani 1 1 d . . .

H12A H 0.5347 0.7967 0.8234 0.067 Uiso 1 1 calc R . .

H12B H 0.4384 0.8705 0.7756 0.067 Uiso 1 1 calc R . .

H12C H 0.4913 0.8044 0.7193 0.067 Uiso 1 1 calc R . .

C13 C 0.46066(17) 0.61707(18) 0.85720(19) 0.0407(6) Uani 1 1 d . . .

H13A H 0.4823 0.6141 0.7937 0.061 Uiso 1 1 calc R . .

H13B H 0.4166 0.5604 0.8922 0.061 Uiso 1 1 calc R . .

H13C H 0.5205 0.6121 0.8976 0.061 Uiso 1 1 calc R . .

C14 C 0.45879(17) 0.71114(17) 1.03194(17) 0.0351(5) Uani 1 1 d . . .

H14 H 0.5149 0.6791 1.0052 0.042 Uiso 1 1 calc R . .

C15 C 0.49662(19) 0.81341(18) 1.02504(19) 0.0445(6) Uani 1 1 d . . .

H15A H 0.4447 0.8475 1.0518 0.067 Uiso 1 1 calc R . .

H15B H 0.5103 0.8561 0.9556 0.067 Uiso 1 1 calc R . .

H15C H 0.5592 0.8024 1.0634 0.067 Uiso 1 1 calc R . .

C16 C 0.44350(18) 0.64045(18) 1.13889(17) 0.0424(6) Uani 1 1 d . . .

H16A H 0.5072 0.6319 1.1750 0.064 Uiso 1 1 calc R . .

H16B H 0.4230 0.5741 1.1416 0.064 Uiso 1 1 calc R . .

H16C H 0.3904 0.6696 1.1693 0.064 Uiso 1 1 calc R . .

C17 C 0.25155(14) 0.49940(15) 1.02870(16) 0.0283(5) Uani 1 1 d . . .

C18 C 0.25396(16) 0.42120(16) 1.12270(18) 0.0358(5) Uani 1 1 d . . .

H18 H 0.2521 0.4383 1.1795 0.043 Uiso 1 1 calc R . .

C19 C 0.25901(17) 0.31903(17) 1.1357(2) 0.0457(7) Uani 1 1 d . . .

H19 H 0.2605 0.2678 1.2006 0.055 Uiso 1 1 calc R . .

C20 C 0.26185(17) 0.29181(18) 1.0551(2) 0.0485(7) Uani 1 1 d . . .

H20 H 0.2654 0.2221 1.0639 0.058 Uiso 1 1 calc R . .

C21 C 0.25951(17) 0.36651(17) 0.9617(2) 0.0431(6) Uani 1 1 d . . .

H21 H 0.2613 0.3485 0.9055 0.052 Uiso 1 1 calc R . .

C22 C 0.25460(15) 0.46816(16) 0.94883(18) 0.0332(5) Uani 1 1 d . . .

H22 H 0.2533 0.5185 0.8834 0.040 Uiso 1 1 calc R . .

P3 P 0.27556(4) 0.86119(4) 0.40373(4) 0.02643(13) Uani 1 1 d DU . .

C23 C 0.2925(7) 0.9776(6) 0.4300(6) 0.038(2) Uani 0.554(9) 1 d PDU A 1

H23 H 0.3238 1.0295 0.3699 0.045 Uiso 0.554(9) 1 calc PR A 1

C24 C 0.3632(4) 0.9578(5) 0.5157(6) 0.0527(19) Uani 0.554(9) 1 d PDU A 1

H24A H 0.3759 1.0221 0.5225 0.079 Uiso 0.554(9) 1 calc PR A 1

H24B H 0.4277 0.9274 0.5035 0.079 Uiso 0.554(9) 1 calc PR A 1

H24C H 0.3321 0.9110 0.5768 0.079 Uiso 0.554(9) 1 calc PR A 1

C25 C 0.1921(10) 1.0256(12) 0.4528(15) 0.044(3) Uani 0.554(9) 1 d PDU A 1

H25A H 0.1553 0.9737 0.5062 0.067 Uiso 0.554(9) 1 calc PR A 1

H25B H 0.1499 1.0521 0.3933 0.067 Uiso 0.554(9) 1 calc PR A 1

H25C H 0.2075 1.0812 0.4734 0.067 Uiso 0.554(9) 1 calc PR A 1

C23' C 0.2810(8) 0.9544(7) 0.4649(8) 0.033(2) Uani 0.446(9) 1 d PDU A 2

H23' H 0.2789 0.9174 0.5385 0.040 Uiso 0.446(9) 1 calc PR A 2

C24' C 0.3800(5) 1.0110(7) 0.4349(10) 0.073(4) Uani 0.446(9) 1 d PDU A 2

H24D H 0.3698 1.0703 0.3729 0.110 Uiso 0.446(9) 1 calc PR A 2

H24E H 0.4334 0.9655 0.4253 0.110 Uiso 0.446(9) 1 calc PR A 2

H24F H 0.4002 1.0334 0.4871 0.110 Uiso 0.446(9) 1 calc PR A 2

C25' C 0.1925(14) 1.0367(16) 0.432(2) 0.060(6) Uani 0.446(9) 1 d PDU A 2

H25D H 0.2097 1.0950 0.4481 0.090 Uiso 0.446(9) 1 calc PR A 2

H25E H 0.1300 1.0077 0.4675 0.090 Uiso 0.446(9) 1 calc PR A 2

H25F H 0.1821 1.0591 0.3608 0.090 Uiso 0.446(9) 1 calc PR A 2

P4 P 0.27346(4) 0.64856(4) 0.48277(4) 0.02437(13) Uani 1 1 d . . .

B3 B 0.16538(18) 0.76080(18) 0.46888(18) 0.0270(5) Uani 1 1 d . A .

Cl2 Cl 0.15674(4) 0.76007(5) 0.59894(4) 0.04225(15) Uani 1 1 d . . .

B4 B 0.37782(18) 0.75014(17) 0.4671(2) 0.0291(5) Uani 1 1 d . A .

H4A H 0.3714(17) 0.7514(16) 0.5419(17) 0.042(6) Uiso 1 1 d . . .

C26 C 0.27795(16) 0.91591(15) 0.26685(16) 0.0308(5) Uani 1 1 d . A .

H26 H 0.2660 0.8586 0.2454 0.037 Uiso 1 1 calc R . .

C27 C 0.38064(18) 0.95800(18) 0.2229(2) 0.0481(6) Uani 1 1 d . . .

H27A H 0.3828 0.9696 0.1523 0.072 Uiso 1 1 calc R A .

H27B H 0.4351 0.9090 0.2574 0.072 Uiso 1 1 calc R . .

H27C H 0.3898 1.0224 0.2307 0.072 Uiso 1 1 calc R . .

C28 C 0.19483(19) 0.99774(17) 0.21816(19) 0.0441(6) Uani 1 1 d . . .

H28A H 0.2093 1.0598 0.2285 0.066 Uiso 1 1 calc R A .

H28B H 0.1288 0.9732 0.2479 0.066 Uiso 1 1 calc R . .

H28C H 0.1933 1.0125 0.1470 0.066 Uiso 1 1 calc R . .

C29 C 0.05295(16) 0.76633(16) 0.42443(16) 0.0320(5) Uani 1 1 d . . .

C30 C 0.05476(17) 0.76729(17) 0.31938(17) 0.0355(5) Uani 1 1 d . A .

H30A H -0.0148 0.7642 0.2986 0.053 Uiso 1 1 calc R . .

H30B H 0.0953 0.7084 0.3183 0.053 Uiso 1 1 calc R . .

H30C H 0.0849 0.8300 0.2739 0.053 Uiso 1 1 calc R . .

C31 C -0.00739(18) 0.6742(2) 0.4912(2) 0.0479(6) Uani 1 1 d . A .

H31A H -0.0766 0.6804 0.4658 0.072 Uiso 1 1 calc R . .

H31B H -0.0100 0.6724 0.5589 0.072 Uiso 1 1 calc R . .

H31C H 0.0261 0.6114 0.4912 0.072 Uiso 1 1 calc R . .

C32 C -0.00735(18) 0.86208(19) 0.4224(2) 0.0448(6) Uani 1 1 d . A .

H32A H 0.0265 0.9228 0.3777 0.067 Uiso 1 1 calc R . .

H32B H -0.0105 0.8625 0.4893 0.067 Uiso 1 1 calc R . .

H32C H -0.0764 0.8619 0.3989 0.067 Uiso 1 1 calc R . .

C33 C 0.28170(17) 0.53509(17) 0.60124(16) 0.0357(5) Uani 1 1 d . A .

H33 H 0.3152 0.4794 0.5843 0.043 Uiso 1 1 calc R . .

C34 C 0.17920(18) 0.49552(18) 0.64762(18) 0.0443(6) Uani 1 1 d . . .

H34A H 0.1901 0.4335 0.7069 0.066 Uiso 1 1 calc R A .

H34B H 0.1389 0.4804 0.5998 0.066 Uiso 1 1 calc R . .

H34C H 0.1428 0.5473 0.6659 0.066 Uiso 1 1 calc R . .

C35 C 0.35034(19) 0.55047(19) 0.67513(18) 0.0467(6) Uani 1 1 d . . .

H35A H 0.3213 0.6049 0.6942 0.070 Uiso 1 1 calc R A .

H35B H 0.4176 0.5692 0.6452 0.070 Uiso 1 1 calc R . .

H35C H 0.3568 0.4873 0.7340 0.070 Uiso 1 1 calc R . .

C36 C 0.27922(16) 0.59102(15) 0.38856(16) 0.0299(5) Uani 1 1 d . A .

H36 H 0.2762 0.6478 0.3219 0.036 Uiso 1 1 calc R . .

C37 C 0.19245(18) 0.52088(17) 0.39450(19) 0.0399(6) Uani 1 1 d . . .

H37A H 0.1965 0.5005 0.3376 0.060 Uiso 1 1 calc R A .

H37B H 0.1272 0.5570 0.3937 0.060 Uiso 1 1 calc R . .

H37C H 0.1980 0.4603 0.4560 0.060 Uiso 1 1 calc R . .

C38 C 0.38008(17) 0.53106(16) 0.39436(19) 0.0384(6) Uani 1 1 d . . .

H38A H 0.3816 0.4699 0.4555 0.058 Uiso 1 1 calc R A .

H38B H 0.4366 0.5736 0.3941 0.058 Uiso 1 1 calc R . .

H38C H 0.3865 0.5114 0.3372 0.058 Uiso 1 1 calc R . .

C39 C 0.49227(15) 0.74688(14) 0.43139(16) 0.0288(5) Uani 1 1 d . . .

C40 C 0.52235(16) 0.73850(15) 0.34255(17) 0.0331(5) Uani 1 1 d . A .

H40 H 0.4714 0.7340 0.2996 0.040 Uiso 1 1 calc R . .

C41 C 0.62335(17) 0.73647(16) 0.31426(19) 0.0404(6) Uani 1 1 d . . .

H41 H 0.6404 0.7299 0.2535 0.049 Uiso 1 1 calc R A .

C42 C 0.69868(17) 0.74395(17) 0.3743(2) 0.0439(6) Uani 1 1 d . A .

H42 H 0.7680 0.7431 0.3551 0.053 Uiso 1 1 calc R . .

C43 C 0.67266(17) 0.75272(16) 0.4622(2) 0.0434(6) Uani 1 1 d . . .

H43 H 0.7244 0.7583 0.5038 0.052 Uiso 1 1 calc R A .

C44 C 0.57145(16) 0.75353(15) 0.49085(18) 0.0359(5) Uani 1 1 d . A .

H44 H 0.5554 0.7587 0.5525 0.043 Uiso 1 1 calc R . .

 

loop_

 _atom_site_aniso_label

 _atom_site_aniso_U_11

 _atom_site_aniso_U_22

 _atom_site_aniso_U_33

 _atom_site_aniso_U_23

 _atom_site_aniso_U_13

 _atom_site_aniso_U_12

P1 0.0222(3) 0.0260(3) 0.0255(3) -0.0102(2) -0.0010(2) 0.0033(2)

P2 0.0223(3) 0.0243(3) 0.0267(3) -0.0074(2) -0.0031(2) 0.0001(2)

B1 0.0298(13) 0.0264(12) 0.0313(14) -0.0130(11) -0.0038(10) 0.0030(10)

Cl1 0.0462(3) 0.0417(3) 0.0378(3) -0.0236(3) -0.0050(3) 0.0021(3)

B2 0.0219(12) 0.0264(12) 0.0264(13) -0.0049(10) -0.0011(10) 0.0023(10)

C1 0.0267(11) 0.0464(13) 0.0375(13) -0.0231(11) 0.0057(10) -0.0007(10)

C2 0.0433(14) 0.0475(14) 0.0373(14) -0.0164(11) 0.0140(11) -0.0066(11)

C3 0.0379(13) 0.0512(14) 0.0521(16) -0.0283(13) 0.0079(12) 0.0088(11)

C4 0.0221(10) 0.0349(11) 0.0318(12) -0.0150(10) -0.0034(9) 0.0044(9)

C5 0.0330(12) 0.0429(13) 0.0491(15) -0.0258(12) -0.0100(11) 0.0031(10)

C6 0.0295(12) 0.0438(13) 0.0391(14) -0.0129(11) -0.0095(10) 0.0093(10)

C7 0.0407(13) 0.0248(11) 0.0450(15) -0.0103(10) -0.0069(11) 0.0032(10)

C8 0.0720(19) 0.0283(12) 0.0644(19) -0.0035(13) -0.0160(15) -0.0127(13)

C9 0.0442(14) 0.0329(12) 0.0372(14) 0.0020(11) -0.0058(11) 0.0043(11)

C10 0.0677(18) 0.0339(13) 0.0600(18) -0.0178(13) -0.0111(14) 0.0178(13)

C11 0.0249(11) 0.0384(12) 0.0328(13) -0.0139(10) -0.0002(9) -0.0026(9)

C12 0.0379(13) 0.0463(14) 0.0418(15) -0.0085(12) 0.0076(11) -0.0063(11)

C13 0.0289(12) 0.0448(13) 0.0531(16) -0.0243(12) 0.0074(11) -0.0040(10)

C14 0.0301(12) 0.0386(12) 0.0369(13) -0.0146(11) -0.0087(10) 0.0020(10)

C15 0.0395(13) 0.0465(14) 0.0499(16) -0.0201(12) -0.0114(12) -0.0070(11)

C16 0.0420(14) 0.0436(13) 0.0381(14) -0.0116(11) -0.0180(11) 0.0056(11)

C17 0.0148(9) 0.0268(10) 0.0369(13) -0.0052(9) -0.0001(9) 0.0010(8)

C18 0.0255(11) 0.0332(12) 0.0407(14) -0.0054(10) 0.0009(10) -0.0014(9)

C19 0.0280(12) 0.0282(12) 0.0595(17) 0.0068(12) -0.0004(11) 0.0006(10)

C20 0.0285(12) 0.0271(12) 0.087(2) -0.0180(14) 0.0035(13) -0.0021(10)

C21 0.0319(12) 0.0360(13) 0.0655(18) -0.0243(13) 0.0058(12) -0.0033(10)

C22 0.0242(11) 0.0311(11) 0.0420(14) -0.0116(10) 0.0023(10) -0.0009(9)

P3 0.0253(3) 0.0229(3) 0.0341(3) -0.0143(2) -0.0048(2) 0.0026(2)

C23 0.041(3) 0.033(4) 0.045(5) -0.021(4) -0.004(3) 0.001(3)

C24 0.046(3) 0.054(4) 0.079(5) -0.048(4) -0.013(3) -0.001(2)

C25 0.042(4) 0.034(4) 0.063(6) -0.027(3) -0.011(3) 0.008(3)

C23' 0.042(4) 0.031(4) 0.035(5) -0.022(4) -0.003(4) -0.002(3)

C24' 0.045(4) 0.068(5) 0.143(10) -0.079(6) 0.002(5) -0.017(3)

C25' 0.055(6) 0.070(11) 0.088(12) -0.068(10) -0.012(6) 0.022(7)

P4 0.0231(3) 0.0235(3) 0.0244(3) -0.0069(2) -0.0011(2) 0.0003(2)

B3 0.0287(12) 0.0307(12) 0.0238(13) -0.0133(10) -0.0004(10) 0.0044(10)

Cl2 0.0444(3) 0.0572(4) 0.0298(3) -0.0230(3) 0.0002(3) 0.0082(3)

B4 0.0268(12) 0.0252(12) 0.0354(15) -0.0114(11) -0.0071(11) 0.0012(10)

C26 0.0359(12) 0.0216(10) 0.0320(12) -0.0070(9) -0.0007(10) 0.0008(9)

C27 0.0433(14) 0.0359(13) 0.0502(16) -0.0003(12) 0.0073(12) -0.0023(11)

C28 0.0465(14) 0.0309(12) 0.0441(15) -0.0029(11) -0.0068(12) 0.0068(11)

C29 0.0253(11) 0.0360(12) 0.0337(13) -0.0125(10) -0.0011(9) 0.0006(9)

C30 0.0316(12) 0.0378(12) 0.0383(13) -0.0156(11) -0.0106(10) 0.0025(10)

C31 0.0288(12) 0.0555(15) 0.0516(16) -0.0112(13) -0.0001(11) -0.0073(11)

C32 0.0319(13) 0.0519(15) 0.0514(16) -0.0220(13) -0.0046(11) 0.0135(11)

C33 0.0373(12) 0.0329(12) 0.0291(13) -0.0038(10) -0.0010(10) 0.0052(10)

C34 0.0451(14) 0.0415(13) 0.0330(14) 0.0000(11) 0.0068(11) -0.0023(11)

C35 0.0479(15) 0.0486(14) 0.0338(14) -0.0055(12) -0.0122(11) 0.0094(12)

C36 0.0356(12) 0.0230(10) 0.0289(12) -0.0076(9) 0.0021(9) -0.0020(9)

C37 0.0428(13) 0.0332(12) 0.0477(15) -0.0193(11) -0.0051(11) -0.0051(10)

C38 0.0413(13) 0.0252(11) 0.0483(15) -0.0140(10) 0.0094(11) -0.0014(10)

C39 0.0272(11) 0.0173(9) 0.0397(13) -0.0085(9) -0.0058(9) 0.0013(8)

C40 0.0290(11) 0.0273(11) 0.0390(13) -0.0079(10) -0.0045(10) -0.0024(9)

C41 0.0362(13) 0.0326(12) 0.0482(15) -0.0110(11) 0.0083(11) -0.0039(10)

C42 0.0251(12) 0.0303(12) 0.0690(19) -0.0112(12) 0.0039(12) -0.0007(10)

C43 0.0270(12) 0.0288(12) 0.0719(19) -0.0156(12) -0.0174(12) 0.0005(10)

C44 0.0324(12) 0.0273(11) 0.0498(15) -0.0164(11) -0.0102(11) 0.0021(9)

 

_geom_special_details

;

 All esds (except the esd in the dihedral angle between two l.s. planes)

 are estimated using the full covariance matrix.  The cell esds are taken

 into account individually in the estimation of esds in distances, angles

 and torsion angles; correlations between esds in cell parameters are only

 used when they are defined by crystal symmetry.  An approximate (isotropic)

 treatment of cell esds is used for estimating esds involving l.s. planes.

;

 

loop_

 _geom_bond_atom_site_label_1

 _geom_bond_atom_site_label_2

 _geom_bond_distance

 _geom_bond_site_symmetry_2

 _geom_bond_publ_flag

P1 C4 1.846(2) . ?

P1 C1 1.859(2) . ?

P1 B2 1.978(2) . ?

P1 B1 2.036(2) . ?

P2 C11 1.853(2) . ?

P2 C14 1.862(2) . ?

P2 B2 1.979(2) . ?

P2 B1 2.047(2) . ?

B1 C7 1.619(3) . ?

B1 Cl1 1.901(3) . ?

B2 C17 1.597(3) . ?

C1 C2 1.517(3) . ?

C1 C3 1.540(3) . ?

C4 C5 1.534(3) . ?

C4 C6 1.534(3) . ?

C7 C10 1.537(3) . ?

C7 C9 1.538(3) . ?

C7 C8 1.543(3) . ?

C11 C12 1.535(3) . ?

C11 C13 1.536(3) . ?

C14 C16 1.515(3) . ?

C14 C15 1.526(3) . ?

C17 C18 1.398(3) . ?

C17 C22 1.400(3) . ?

C18 C19 1.393(3) . ?

C19 C20 1.374(4) . ?

C20 C21 1.371(4) . ?

C21 C22 1.386(3) . ?

P3 C26 1.848(2) . ?

P3 C23 1.864(8) . ?

P3 C23' 1.869(9) . ?

P3 B4 1.981(2) . ?

P3 B3 2.033(2) . ?

C23 C24 1.509(9) . ?

C23 C25 1.551(11) . ?

C23' C24' 1.529(11) . ?

C23' C25' 1.562(12) . ?

P4 C36 1.852(2) . ?

P4 C33 1.863(2) . ?

P4 B4 1.986(2) . ?

P4 B3 2.047(2) . ?

B3 C29 1.618(3) . ?

B3 Cl2 1.899(2) . ?

B4 C39 1.589(3) . ?

C26 C27 1.529(3) . ?

C26 C28 1.534(3) . ?

C29 C30 1.530(3) . ?

C29 C32 1.539(3) . ?

C29 C31 1.542(3) . ?

C33 C35 1.509(3) . ?

C33 C34 1.527(3) . ?

C36 C37 1.530(3) . ?

C36 C38 1.534(3) . ?

C39 C40 1.396(3) . ?

C39 C44 1.403(3) . ?

C40 C41 1.387(3) . ?

C41 C42 1.374(3) . ?

C42 C43 1.373(4) . ?

C43 C44 1.390(3) . ?

 

loop_

 _geom_angle_atom_site_label_1

 _geom_angle_atom_site_label_2

 _geom_angle_atom_site_label_3

 _geom_angle

 _geom_angle_site_symmetry_1

 _geom_angle_site_symmetry_3

 _geom_angle_publ_flag

C4 P1 C1 103.63(10) . . ?

C4 P1 B2 115.81(10) . . ?

C1 P1 B2 113.45(10) . . ?

C4 P1 B1 116.05(10) . . ?

C1 P1 B1 120.19(10) . . ?

B2 P1 B1 87.98(10) . . ?

C11 P2 C14 102.92(10) . . ?

C11 P2 B2 114.93(10) . . ?

C14 P2 B2 114.08(10) . . ?

C11 P2 B1 118.29(10) . . ?

C14 P2 B1 119.27(10) . . ?

B2 P2 B1 87.67(10) . . ?

C7 B1 Cl1 110.74(15) . . ?

C7 B1 P1 125.40(16) . . ?

Cl1 B1 P1 103.00(12) . . ?

C7 B1 P2 124.03(17) . . ?

Cl1 B1 P2 102.90(11) . . ?

P1 B1 P2 86.36(9) . . ?

C17 B2 P1 126.55(15) . . ?

C17 B2 P2 127.16(16) . . ?

P1 B2 P2 89.86(10) . . ?

C2 C1 C3 111.08(19) . . ?

C2 C1 P1 112.53(15) . . ?

C3 C1 P1 113.71(16) . . ?

C5 C4 C6 108.30(17) . . ?

C5 C4 P1 112.14(15) . . ?

C6 C4 P1 114.51(15) . . ?

C10 C7 C9 107.9(2) . . ?

C10 C7 C8 107.0(2) . . ?

C9 C7 C8 107.8(2) . . ?

C10 C7 B1 110.8(2) . . ?

C9 C7 B1 113.22(18) . . ?

C8 C7 B1 109.81(19) . . ?

C12 C11 C13 108.26(18) . . ?

C12 C11 P2 114.84(16) . . ?

C13 C11 P2 111.00(16) . . ?

C16 C14 C15 110.99(19) . . ?

C16 C14 P2 112.16(15) . . ?

C15 C14 P2 114.41(16) . . ?

C18 C17 C22 115.6(2) . . ?

C18 C17 B2 119.4(2) . . ?

C22 C17 B2 124.99(19) . . ?

C19 C18 C17 122.0(2) . . ?

C20 C19 C18 120.4(2) . . ?

C21 C20 C19 119.2(2) . . ?

C20 C21 C22 120.4(2) . . ?

C21 C22 C17 122.4(2) . . ?

C26 P3 C23 100.5(3) . . ?

C26 P3 C23' 115.8(3) . . ?

C23 P3 C23' 15.8(4) . . ?

C26 P3 B4 115.42(11) . . ?

C23 P3 B4 114.2(3) . . ?

C23' P3 B4 108.0(4) . . ?

C26 P3 B3 116.34(10) . . ?

C23 P3 B3 123.0(3) . . ?

C23' P3 B3 109.6(3) . . ?

B4 P3 B3 88.34(10) . . ?

C24 C23 C25 107.5(9) . . ?

C24 C23 P3 112.1(5) . . ?

C25 C23 P3 114.1(8) . . ?

C24' C23' C25' 106.7(12) . . ?

C24' C23' P3 109.0(6) . . ?

C25' C23' P3 112.5(10) . . ?

C36 P4 C33 102.60(10) . . ?

C36 P4 B4 114.90(10) . . ?

C33 P4 B4 114.23(10) . . ?

C36 P4 B3 118.66(10) . . ?

C33 P4 B3 119.05(10) . . ?

B4 P4 B3 87.80(10) . . ?

C29 B3 Cl2 110.41(15) . . ?

C29 B3 P3 124.89(16) . . ?

Cl2 B3 P3 103.25(11) . . ?

C29 B3 P4 124.64(15) . . ?

Cl2 B3 P4 102.74(11) . . ?

P3 B3 P4 86.61(9) . . ?

C39 B4 P3 125.57(16) . . ?

C39 B4 P4 127.20(16) . . ?

P3 B4 P4 89.74(10) . . ?

C27 C26 C28 108.45(18) . . ?

C27 C26 P3 113.52(16) . . ?

C28 C26 P3 115.16(16) . . ?

C30 C29 C32 108.05(18) . . ?

C30 C29 C31 108.01(19) . . ?

C32 C29 C31 106.67(19) . . ?

C30 C29 B3 112.95(18) . . ?

C32 C29 B3 110.81(18) . . ?

C31 C29 B3 110.11(18) . . ?

C35 C33 C34 111.5(2) . . ?

C35 C33 P4 112.31(16) . . ?

C34 C33 P4 114.59(15) . . ?

C37 C36 C38 108.24(17) . . ?

C37 C36 P4 114.78(15) . . ?

C38 C36 P4 110.96(15) . . ?

C40 C39 C44 115.4(2) . . ?

C40 C39 B4 124.92(19) . . ?

C44 C39 B4 119.6(2) . . ?

C41 C40 C39 122.8(2) . . ?

C42 C41 C40 119.9(2) . . ?

C43 C42 C41 119.3(2) . . ?

C42 C43 C44 120.6(2) . . ?

C43 C44 C39 121.9(2) . . ?

 

_diffrn_measured_fraction_theta_max    0.979

_diffrn_reflns_theta_full              24.71

_diffrn_measured_fraction_theta_full   0.979

_refine_diff_density_max    0.426

_refine_diff_density_min   -0.238

_refine_diff_density_rms    0.043
